# Supplementary material for: Exogenous Iron Increases Fasciocidal Activity and Hepatocellular Toxicity of the Synthetic Endoperoxides OZ78 and MT04
Source: MDPI journal article supplement (doi:10.3390/ijms20194880), 2019-10-01
Supplement: s1 [file s1]

**Supplementary Table 1:** Effect of AS, OZ78 and MT04 on mouse liver histology. Mice were treated by oral gavage with single doses of 200, 400 and 800 mg/kg of AS, OZ78 or MT04. Livers were obtained 8 hours after oral administration.

| Treatment      | Dose      | Mouse | Histopathologic observation                                |
|----------------|-----------|-------|------------------------------------------------------------|
| <b>Control</b> |           | 1     | No lesions                                                 |
|                |           | 2     | No lesions                                                 |
|                |           | 3     | No lesions                                                 |
|                |           | 4     | No lesions                                                 |
|                |           | 5     | Focal hemorrhage, severe acute congestion, syncytial cells |
|                |           | 6     | No lesion                                                  |
|                |           | 7     | Steatosis and syncytial cells                              |
| <b>AS</b>      | 200 mg/kg | 1     | No lesions                                                 |
|                |           | 2     | No lesions                                                 |
|                |           | 3     | No lesions                                                 |
|                | 400 mg/kg | 1     | No lesions                                                 |
|                |           | 2     | No lesions                                                 |
|                |           | 3     | Beginning nodular regeneration                             |
|                | 800 mg/kg | 1     | Steatosis                                                  |
|                |           | 2     | Small area of confluent necrosis                           |
|                |           | 3     | No lesions                                                 |
| <b>OZ78</b>    | 200 mg/kg | 1     | No lesions                                                 |
|                |           | 2     | Slight hydropic degeneration                               |
|                |           | 3     | Slight hydropic degeneration                               |
|                |           | 4     | No lesions                                                 |
|                | 400 mg/kg | 1     | Slight hydropic degeneration                               |
|                |           | 2     | Passive congestion                                         |
|                |           | 3     | Nuclear polymorphism                                       |
|                |           | 4     | Slight hydropic degeneration                               |
|                | 800 mg/kg | 1     | Slight hydropic degeneration                               |
|                |           | 2     | No lesions                                                 |
|                |           | 3     | Passive congestion                                         |
|                |           | 4     | Slight hydropic degeneration                               |
| <b>MT04</b>    | 200 mg/kg | 1     | No lesions                                                 |
|                |           | 2     | No lesions                                                 |
|                |           | 3     | No lesions                                                 |
|                |           | 4     | Nuclear polymorphism                                       |
|                | 400 mg/kg | 1     | Nuclear polymorphism                                       |
|                |           | 2     | Nuclear polymorphism                                       |
|                |           | 3     | No lesions                                                 |
|                |           | 4     | No lesions                                                 |
|                | 800 mg/kg | 1     | No lesions                                                 |
|                |           | 2     | Slight hydropic degeneration                               |
|                |           | 3     | Slight hydropic degeneration and nuclear polymorphism      |
|                |           | 4     | Slight hydropic degeneration and nuclear polymorphism      |
